# Supplementary material for: Savanna ecosystem structure and productivity along a rainfall gradient: the role of competition and stress tolerance mediated by plant functional traits
Source: Copernicus journal article supplement (doi:10.5194/egusphere-2024-3977), 2025-01-17
Supplement: Supplementary file 1 [file egusphere-2024-3977-supplement.pdf]

Supplement of

**Savanna ecosystem structure and productivity along a rainfall gradient: the role of competition and stress tolerance mediated by plant functional traits**

Prashant Paudel<sup>1</sup>, Stefan Olin<sup>2</sup>, Mark Tjoelker<sup>1</sup>, Mikael Pontarp<sup>3</sup>, Daniel Metcalfe<sup>4</sup> and Benjamin Smith<sup>2,1</sup>

*<sup>1</sup> Hawkesbury Institute for the Environment, Western Sydney University, Penrith, NSW, Australia*

*<sup>2</sup> Department of Physical Geography and Ecosystem Science, Lund University, Lund Sweden*

*<sup>3</sup> Department of Biology, Lund University, Lund, Sweden*

*<sup>4</sup> Department of Ecology and Environment Science, Umeå University*

### **Clustering of Species into functional groups**

A hierarchical clustering process was used to group species into different clusters based on similarity in plant strategies where species were progressively divided into functionally different groups. Initially, species were divided based on nitrogen fixation capacity, where only three species were identified as nitrogen fixers. Among nitrogen fixers, two species were identified as high-water-requiring species (C1: Nitrogen fixing Mesic Tree), and Acacia species was identified as intermediate water-requiring species (C2: Acacia-Nitrogen fixing intermediate trees). On another side, no-nitrogen fixers were savanna trees differing in height and leaf phenology (evergreen and deciduous). Firstly, savanna trees were divided into three groups based on height (height >25m as taller, 10-25 m as medium, and <10 as small trees). These trees were further divided based on leaf phenology, resulting in five different clusters, namely tall eucalypt, medium evergreen savanna trees, medium deciduous trees, small evergreen trees, and small deciduous trees.

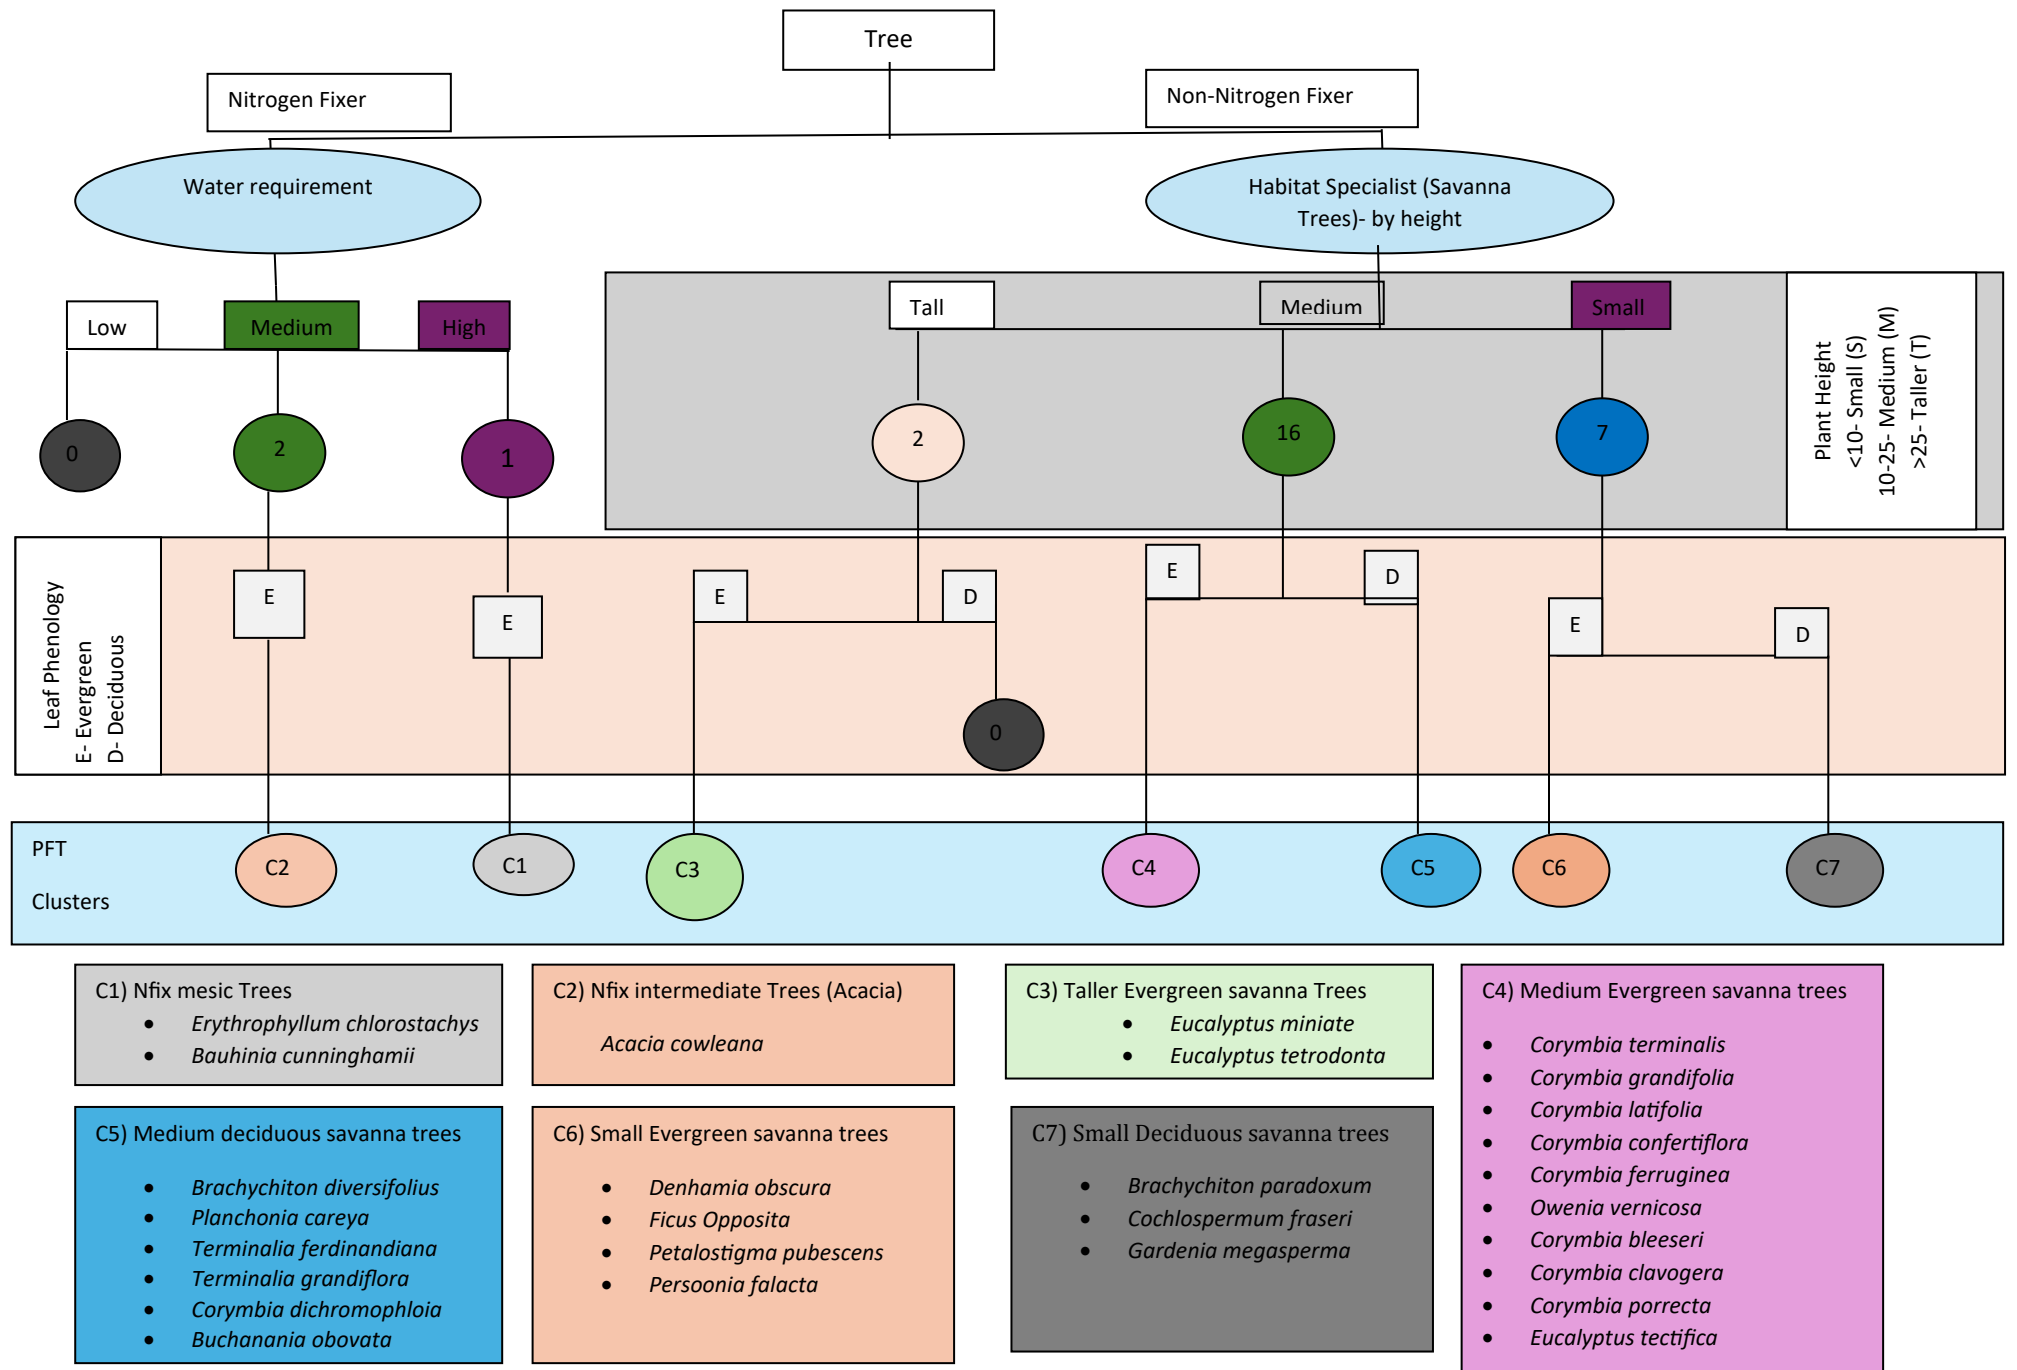

Figure S.1: Diagram showing hierarchical clustering of tree species into Seven clusters

## Traits and parameter values

The compilation of species traits information (data) for all 28 species, including understory vegetation, from various sources such as AusTraits was done. Key traits such as leaf phenology, leaf longevity, wood density, nitrogen fixation potential, plant height, specific leaf area, shade tolerance, and leaf turnover rate were compiled. These traits reflect both the phenological and morphological characteristics of the species, as well as their ecological strategies. According to Williams et al. (1996), tropical savannas typically contain either tropical broadleaved evergreen or tropical broadleaved raingreen trees, which shed their leaves in the dry season, depending on the rainfall patterns and evolutionary history of the region. Additionally, data on the rainfall status at species occurrence sites and their responses to fire were recorded to provide a comprehensive understanding of their ecological roles. Following the compilation of species traits, these data were used to define the parameters for each Plant Functional Type (PFT). The parameters included leaf phenology (evergreen or rain green), leaf longevity, wood density, specific leaf area, shade tolerance, leaf turnover rate (calculated as 1/leaf longevity), and the ratio of leaf area to sapwood cross-section area ( $k_{latosa}$ ). For each PFT cluster, the mean values of these parameters were calculated by averaging the recorded values of the species within that cluster.

Table S.1: Parameter and their values (field observation and adjusted) for all tree PFTs

| Parameters                                                | PFTs                        |                               |                               |             |                                |                                |                                            |
|-----------------------------------------------------------|-----------------------------|-------------------------------|-------------------------------|-------------|--------------------------------|--------------------------------|--------------------------------------------|
|                                                           | Tall eucalypt<br>(Tall_euc) | Medium evergreen<br>(Med_eve) | Medium Deciduous<br>(Med_dec) | Acacia      | Small evergreen<br>(small_eve) | Small deciduous<br>(small_dec) | Nitrogen fixing mesic tree<br>(Nfix_mecic) |
| Zone                                                      | Tropical                    | Tropical                      | Tropical                      | Tropical    | Tropical                       | Tropical                       | Tropical                                   |
| Leaf phenology                                            | Broadleaved                 | Broadleaved                   | Broadleaved                   | Broadleaved | Broadleaved                    | Broadleaved                    | Broadleaved                                |
|                                                           | Evergreen                   | Evergreen                     | Raingreen                     | Evergreen   | Evergreen                      | Raingreen                      | Raingreen                                  |
| Shade tolerance                                           | Intolerant                  | Intolerant                    | Intolerant                    | Intolerant  | Intermediate tolerant          | Intolerant                     | Intolerant                                 |
| SLA (m <sup>2</sup> /kgC)                                 | 11                          | 11                            | 18                            | 12          | 11                             | 26                             | 20                                         |
| Wood Density (kgC/m <sup>3</sup> )<br>(field observation) | 425                         | 350                           | 360                           | 355         | 320                            | 355                            | 500                                        |

| Parameters                                                          | PFTs                        |                                  |                                  |        |                                   |                                   |                                               |
|---------------------------------------------------------------------|-----------------------------|----------------------------------|----------------------------------|--------|-----------------------------------|-----------------------------------|-----------------------------------------------|
|                                                                     | Tall eucalypt<br>(Tall_euc) | Medium<br>evergreen<br>(Med_eve) | Medium<br>Deciduous<br>(Med_dec) | Acacia | Small<br>evergreen<br>(small_eve) | Small<br>deciduous<br>(small_dec) | Nitrogen fixing<br>mesic tree<br>(Nfix_mecic) |
| Wood Density (kgC/m <sup>3</sup> )-<br>(adjusted)                   | 230                         | 250                              | 250                              | 350    | 190                               | 250                               | 250                                           |
| Leaf area to Sapwood<br>cross-section area - (field<br>observation) | 5000                        | 3900                             | 3150                             | 4600   | 3000                              | 1760                              | 3800                                          |
| Leaf area to Sapwood<br>cross-section area<br>(adjusted)            | 5200                        | 4500                             | 4000                             | 4500   | 4000                              | 2000                              | 3800                                          |
| Leaflong (years)                                                    | 1.5 (13-18<br>months)       | 1.5 (use from<br>Tall_euc)       | 0.8 (9 months)                   | 2      | 2                                 | 0.4 (3-5<br>months)               | 0.7 (9 months)                                |
| Turnover leaf<br>(fraction/year)                                    | 0.6                         | 0.66                             | 1                                | 0.5    | 0.5                               | 1                                 | 1                                             |
| Root in to 50 cm (%)                                                | 43.1                        | 43.1                             | 47.6                             | 45     | 55                                | 47.6                              | 62.8                                          |

PFT wise wood Density and Mean

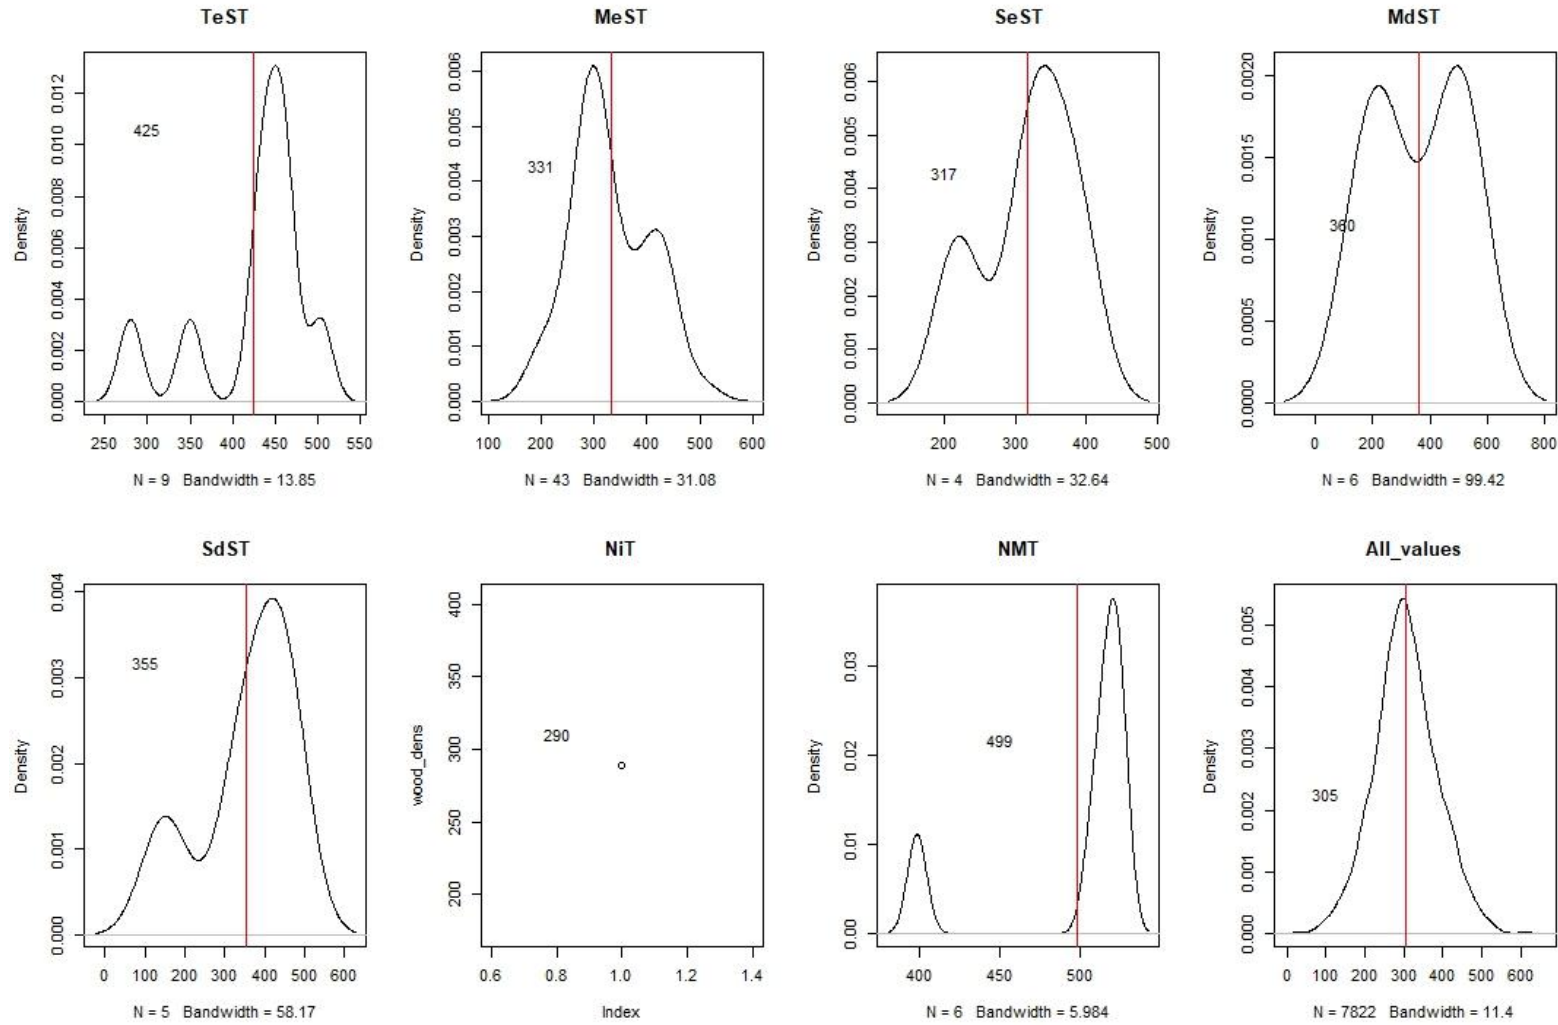

Figure S.2: PFT wise wood density from AusTraits

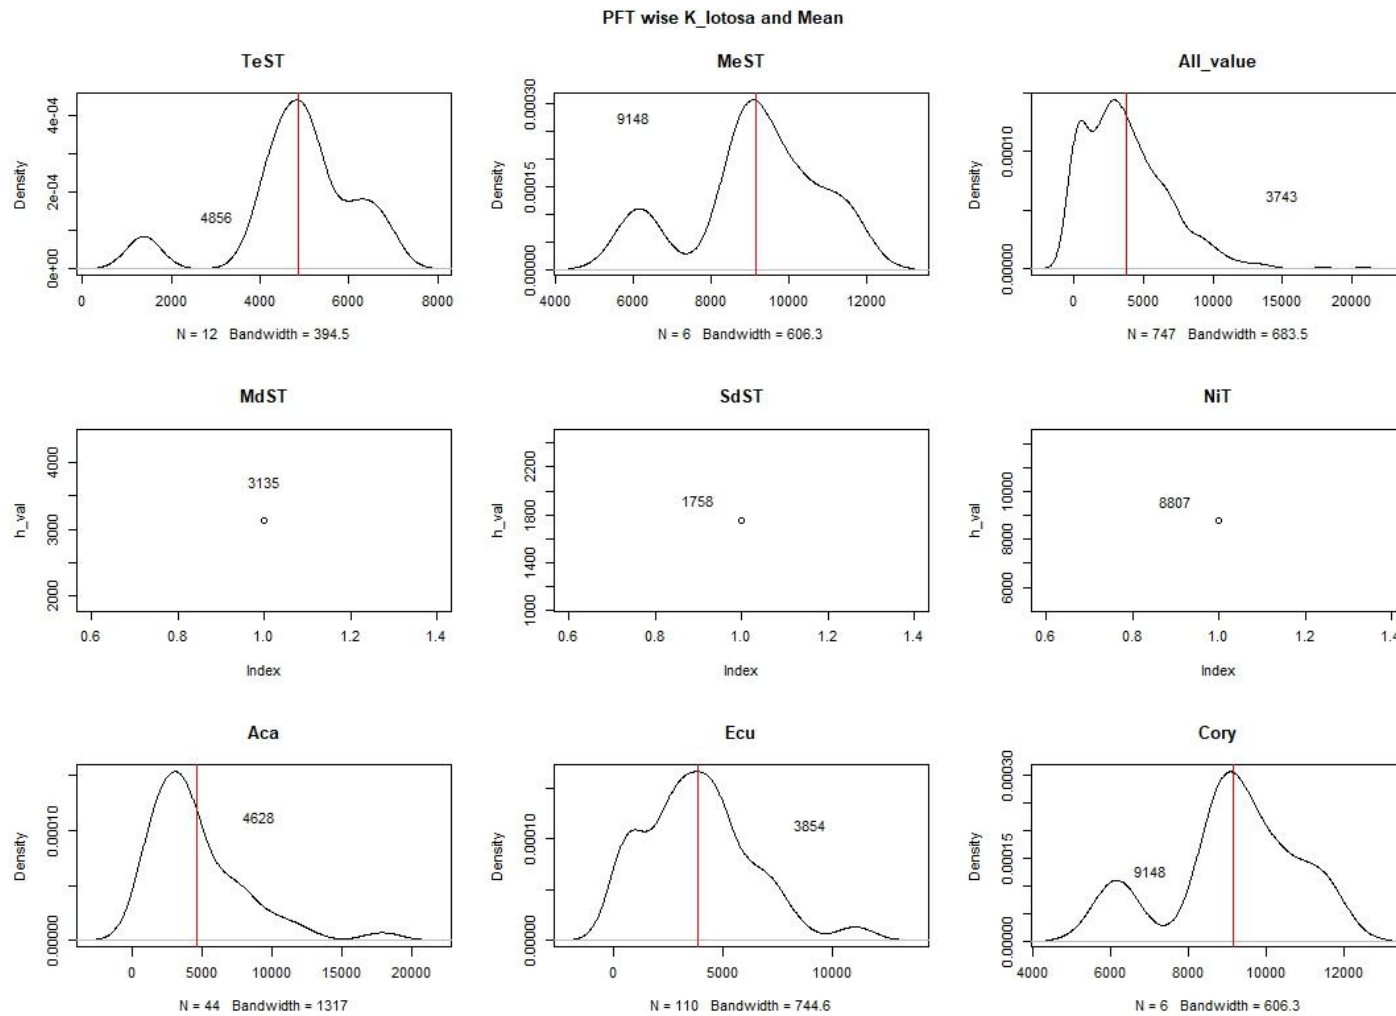

Figure S.3.: PFT wise leaf area to sapwood cross section area ( $k_{latosa}$ ) from AusTraits

PFT wise SLA and Mean

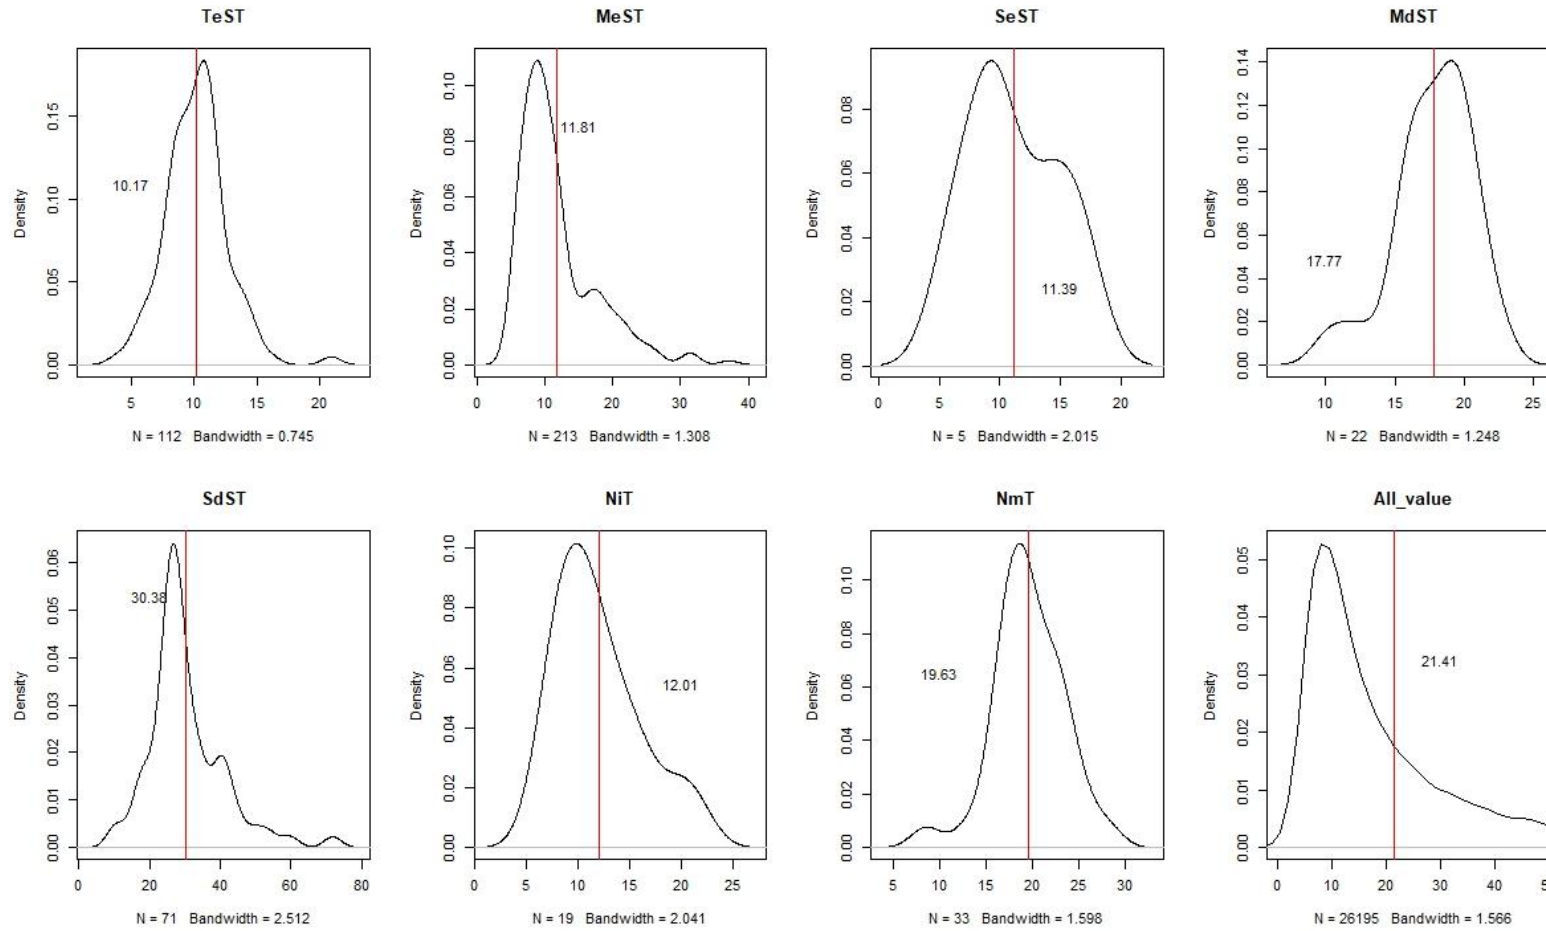

Figure S.4 : PFT wise Specific leaf area from AusTraits
